# Supplementary material for: Effect of 12-Week Daily Intake of the High-Lycopene Tomato (Solanum Lycopersicum), a Variety Named “PR-7”, on Lipid Metabolism: A Randomized, Double-Blind, Placebo-Controlled, Parallel-Group Study
Source: PubMed Central journal article supplement (PMC6566250; doi:10.3390/nu11051177), 2019-05-25
Supplement: nutrients-11-01177-s001.pdf [file nutrients-11-01177-s001.pdf]

## Supplementary

**Table S1.** Nutrients from the subjects' daily diet over the past month at each visit

|                     |                          | Week 0         | ΔWeek 4       | ΔWeek 8       | ΔWeek 12       |
|---------------------|--------------------------|----------------|---------------|---------------|----------------|
| Calorie (kcal)      | Placebo ( <i>n</i> = 41) | 1873.1 ± 363.5 | -26.1 ± 286.3 | -81.7 ± 197.0 | -110.7 ± 211.5 |
|                     | Active ( <i>n</i> = 33)  | 1726.0 ± 372.5 | -51.3 ± 202.6 | -36.2 ± 295.6 | -43.7 ± 258.7  |
|                     | <i>p</i> <sup>a</sup>    | 0.091          | 0.66          | 0.43          | 0.22           |
| Protein (g)         | Placebo ( <i>n</i> = 41) | 68.3 ± 20.2    | -0.7 ± 10.9   | -3.5 ± 8.7    | -4.0 ± 10.7    |
|                     | Active ( <i>n</i> = 33)  | 59.9 ± 12.5    | -1.0 ± 9.7    | -1.6 ± 11.2   | -1.1 ± 12.3    |
|                     | <i>p</i> <sup>a</sup>    | 0.032*         | 0.91          | 0.45          | 0.29           |
| Lipid (g)           | Placebo ( <i>n</i> = 41) | 64.0 ± 19.0    | -1.2 ± 13.3   | -3.2 ± 9.8    | -3.8 ± 11.1    |
|                     | Active ( <i>n</i> = 33)  | 60.5 ± 18.6    | -4.1 ± 9.2    | -2.2 ± 13.0   | -2.5 ± 11.9    |
|                     | <i>p</i> <sup>a</sup>    | 0.42           | 0.29          | 0.71          | 0.63           |
| Carbohydrate (g)    | Placebo ( <i>n</i> = 41) | 242.1 ± 38.7   | -3.3 ± 38.7   | -9.8 ± 28.5   | -15.1 ± 27.2   |
|                     | Active ( <i>n</i> = 33)  | 226.7 ± 49.8   | -2.4 ± 28.8   | -3.5 ± 43.0   | -5.2 ± 29.2    |
|                     | <i>p</i> <sup>a</sup>    | 0.14           | 0.92          | 0.45          | 0.14           |
| Dietary fiber (g)   | Placebo ( <i>n</i> = 41) | 13.0 ± 3.9     | -0.2 ± 2.3    | -0.9 ± 2.3    | -0.7 ± 2.6     |
|                     | Active ( <i>n</i> = 33)  | 12.0 ± 3.3     | -0.4 ± 2.6    | -0.5 ± 2.6    | -1.0 ± 2.5     |
|                     | <i>p</i> <sup>a</sup>    | 0.24           | 0.79          | 0.55          | 0.57           |
| Sodium chloride (g) | Placebo ( <i>n</i> = 41) | 9.3 ± 3.2      | -1.0 ± 2.5    | -1.1 ± 2.3    | -1.2 ± 3.0     |
|                     | Active ( <i>n</i> = 33)  | 8.7 ± 2.6      | -0.9 ± 1.9    | -0.8 ± 2.0    | -1.2 ± 1.7     |
|                     | <i>p</i> <sup>a</sup>    | 0.43           | 0.93          | 0.65          | 0.93           |

Values are shown as the mean ± standard deviation. ΔWeek 4: changes in values from baseline to week 4; ΔWeek 8: changes in values from baseline to week 8; ΔWeek 12: changes in values from baseline to week 12. Student's *t*-test was used for data analysis. \**p* < 0.05 vs. placebo group.

**Table S2.** Vital signs, body composition, complete blood count, liver function, renal function, and blood glucose profiles.

|                            |                          | Week 0       | ΔWeek 4     | ΔWeek 8     | ΔWeek 12    |
|----------------------------|--------------------------|--------------|-------------|-------------|-------------|
| SBP (mmHg)                 | Placebo ( <i>n</i> = 49) | 118.1 ± 16.1 | -4.6 ± 10.4 | -3.0 ± 12.0 | -3.4 ± 9.4  |
|                            | Active ( <i>n</i> = 49)  | 119.2 ± 17.5 | -3.8 ± 10.0 | -1.2 ± 10.2 | -2.5 ± 8.8  |
|                            | <i>p</i> <sup>a</sup>    | 0.75         | 0.71        | 0.44        | 0.63        |
| DBP (mmHg)                 | Placebo ( <i>n</i> = 49) | 75.1 ± 10.4  | -3.4 ± 6.5  | -1.7 ± 7.3  | -2.7 ± 6.4  |
|                            | Active ( <i>n</i> = 49)  | 75.8 ± 11.5  | -1.8 ± 5.2  | -1.1 ± 6.0  | -1.0 ± 5.5  |
|                            | <i>p</i> <sup>a</sup>    | 0.78         | 0.20        | 0.64        | 0.17        |
| Pulse rate (bpm)           | Placebo ( <i>n</i> = 49) | 66.8 ± 10.6  | 2.7 ± 7.6   | 0.8 ± 6.3   | 2.0 ± 6.8   |
|                            | Active ( <i>n</i> = 49)  | 68.7 ± 10.3  | 2.5 ± 7.1   | 1.4 ± 8.3   | 0.8 ± 8.7   |
|                            | <i>p</i> <sup>a</sup>    | 0.37         | 0.88        | 0.70        | 0.46        |
| BW (kg)                    | Placebo ( <i>n</i> = 49) | 57.2 ± 9.5   | -0.2 ± 0.6  | -0.2 ± 0.6  | -0.3 ± 0.9  |
|                            | Active ( <i>n</i> = 49)  | 58.7 ± 11.8  | -0.1 ± 0.7  | -0.1 ± 0.8  | 0.1 ± 1.0   |
|                            | <i>p</i> <sup>a</sup>    | 0.49         | 0.55        | 0.37        | 0.095       |
| BFR (%)                    | Placebo ( <i>n</i> = 49) | 26.1 ± 6.5   | -0.2 ± 0.8  | -0.6 ± 1.0  | -0.2 ± 1.0  |
|                            | Active ( <i>n</i> = 49)  | 27.3 ± 5.9   | -0.7 ± 0.8  | -0.6 ± 0.9  | -0.2 ± 0.9  |
|                            | <i>p</i> <sup>a</sup>    | 0.34         | 0.001**     | 0.97        | 0.83        |
| BMI (kg/m <sup>2</sup> )   | Placebo ( <i>n</i> = 49) | 21.7 ± 2.6   | -0.1 ± 0.2  | -0.1 ± 0.2  | -0.1 ± 0.4  |
|                            | Active ( <i>n</i> = 49)  | 22.2 ± 3.0   | 0.0 ± 0.3   | 0.0 ± 0.3   | 0.0 ± 0.4   |
|                            | <i>p</i> <sup>a</sup>    | 0.38         | 0.52        | 0.30        | 0.10        |
| WBC (×10 <sup>3</sup> /μl) | Placebo ( <i>n</i> = 49) | 5.1 ± 1.1    | 0.2 ± 0.7   | 0.0 ± 0.7   | 0.2 ± 0.6   |
|                            | Active ( <i>n</i> = 49)  | 5.1 ± 1.3    | 0.1 ± 0.7   | 0.0 ± 0.8   | 0.0 ± 0.8   |
|                            | <i>p</i> <sup>a</sup>    | 0.85         | 0.65        | 0.70        | 0.36        |
| RBC (×10 <sup>4</sup> /μl) | Placebo ( <i>n</i> = 49) | 466.6 ± 36.7 | 0.1 ± 17.1  | -8.8 ± 20.3 | -6.3 ± 28.7 |
|                            | Active ( <i>n</i> = 49)  | 468.8 ± 45.2 | -3.5 ± 16.7 | -9.6 ± 20.4 | -7.7 ± 18.9 |
|                            | <i>p</i> <sup>a</sup>    | 0.79         | 0.31        | 0.85        | 0.79        |
| Hb (g/dl)                  | Placebo ( <i>n</i> = 49) | 14.0 ± 1.4   | 0.0 ± 0.5   | -0.2 ± 0.6  | -0.1 ± 0.7  |
|                            | Active ( <i>n</i> = 49)  | 14.0 ± 1.4   | -0.1 ± 0.5  | -0.3 ± 0.5  | -0.2 ± 0.5  |
|                            | <i>p</i> <sup>a</sup>    | 0.85         | 0.18        | 0.52        | 0.40        |

|                            |                       |              |             |              |              |
|----------------------------|-----------------------|--------------|-------------|--------------|--------------|
| Ht (%)                     | Placebo (n = 49)      | 43.3 ± 3.7   | 0.0 ± 1.8   | -1.2 ± 2.0   | -0.6 ± 2.6   |
|                            | Active (n = 49)       | 43.2 ± 3.7   | -0.4 ± 1.6  | -1.2 ± 1.9   | -0.8 ± 1.6   |
|                            | <i>p</i> <sup>a</sup> | 0.84         | 0.21        | 0.93         | 0.75         |
| Plt (×10 <sup>4</sup> /μl) | Placebo (n = 49)      | 24.6 ± 4.5   | -0.3 ± 2.1  | -0.6 ± 2.1   | -0.1 ± 2.2   |
|                            | Active (n = 49)       | 24.1 ± 4.8   | 0.4 ± 2.0   | 0.5 ± 2.2    | 0.6 ± 2.4    |
|                            | <i>p</i> <sup>a</sup> | 0.63         | 0.095       | 0.018*       | 0.16         |
| AST (U/l)                  | Placebo (n = 49)      | 21.1 ± 5.5   | -0.3 ± 3.2  | -0.6 ± 4.7   | -0.9 ± 4.5   |
|                            | Active (n = 49)       | 20.3 ± 3.6   | 0.9 ± 2.5   | 0.1 ± 2.3    | -0.2 ± 2.7   |
|                            | <i>p</i> <sup>a</sup> | 0.382        | 0.053       | 0.368        | 0.321        |
| ALT (U/l)                  | Placebo (n = 49)      | 18.6 ± 7.3   | -1.3 ± 4.4  | -1.3 ± 6.0   | -1.1 ± 6.6   |
|                            | Active (n = 49)       | 17.7 ± 5.2   | 1.1 ± 4.7   | 0.1 ± 3.7    | -0.2 ± 3.8   |
|                            | <i>p</i> <sup>a</sup> | 0.47         | 0.012*      | 0.19         | 0.39         |
| γ-GTP (U/l)                | Placebo (n = 49)      | 27.2 ± 17.3  | -2.9 ± 9.3  | -2.7 ± 8.8   | -0.3 ± 10.7  |
|                            | Active (n = 49)       | 23.6 ± 13.0  | 0.1 ± 7.1   | 0.1 ± 5.7    | 1.6 ± 8.7    |
|                            | <i>p</i> <sup>a</sup> | 0.25         | 0.082       | 0.075        | 0.35         |
| ALP (U/l)                  | Placebo (n = 49)      | 214.0 ± 57.7 | -1.1 ± 19.6 | -6.7 ± 21.6  | -4.2 ± 21.0  |
|                            | Active (n = 49)       | 189.3 ± 45.9 | -1.2 ± 15.5 | -2.6 ± 16.3  | -2.3 ± 18.7  |
|                            | <i>p</i> <sup>a</sup> | 0.021*       | 0.99        | 0.32         | 0.65         |
| LDH (U/l)                  | Placebo (n = 49)      | 190.4 ± 31.1 | -8.3 ± 21.4 | -11.9 ± 19.5 | -16.6 ± 19.0 |
|                            | Active (n = 49)       | 192.4 ± 30.8 | -2.8 ± 20.1 | -10.6 ± 21.5 | -12.9 ± 21.8 |
|                            | <i>p</i> <sup>a</sup> | 0.75         | 0.20        | 0.76         | 0.38         |
| BUN (mg/dL)                | Placebo (n = 49)      | 13.2 ± 3.3   | 0.9 ± 2.5   | 0.7 ± 2.8    | 1.1 ± 2.1    |
|                            | Active (n = 49)       | 14.0 ± 2.7   | 0.3 ± 2.5   | 0.1 ± 2.5    | 0.6 ± 2.4    |
|                            | <i>p</i> <sup>a</sup> | 0.21         | 0.26        | 0.32         | 0.27         |
| CRE (mg/dL)                | Placebo (n = 49)      | 0.8 ± 0.1    | 0.0 ± 0.0   | 0.0 ± 0.1    | 0.0 ± 0.1    |
|                            | Active (n = 49)       | 0.8 ± 0.1    | 0.0 ± 0.1   | 0.0 ± 0.1    | 0.0 ± 0.1    |
|                            | <i>p</i> <sup>a</sup> | 0.36         | 0.62        | 0.63         | 0.35         |
| UA (mg/dL)                 | Placebo (n = 49)      | 5.1 ± 1.1    | 0.1 ± 0.6   | 0.2 ± 0.6    | 0.3 ± 0.7    |
|                            | Active (n = 49)       | 5.5 ± 1.2    | 0.2 ± 0.5   | 0.1 ± 0.5    | 0.2 ± 0.6    |
|                            | <i>p</i> <sup>a</sup> | 0.13         | 0.89        | 0.50         | 0.56         |
| FPG (mg/dL)                | Placebo (n = 49)      | 88.0 ± 7.0   | 1.7 ± 4.3   | 1.4 ± 3.8    | 0.4 ± 4.5    |
|                            | Active (n = 49)       | 87.8 ± 8.7   | 2.1 ± 5.3   | 0.6 ± 3.2    | -0.7 ± 4.3   |
|                            | <i>p</i> <sup>a</sup> | 0.91         | 0.71        | 0.25         | 0.24         |
| HbA1c (%)                  | Placebo (n = 49)      | 5.5 ± 0.3    | -0.1 ± 0.3  | 0.0 ± 0.2    | -0.2 ± 0.2   |
|                            | Active (n = 49)       | 5.6 ± 0.4    | -0.1 ± 0.2  | 0.0 ± 0.1    | -0.2 ± 0.2   |
|                            | <i>p</i> <sup>a</sup> | 0.15         | 0.86        | 0.89         | 0.93         |
| HOMA-IR                    | Placebo (n = 49)      | 0.8 ± 0.5    | 0.1 ± 0.3   | 0.1 ± 0.4    | 0.1 ± 0.3    |
|                            | Active (n = 49)       | 0.8 ± 0.4    | 0.1 ± 0.4   | 0.1 ± 0.4    | 0.1 ± 0.3    |
|                            | <i>p</i> <sup>a</sup> | 0.86         | 0.50        | 0.73         | 0.73         |

Values are shown as the mean ± standard deviation. Student's *t*-test was performed. \* *p*<sup>a</sup> < 0.05 vs. placebo group. ΔWeek: changes in values from baseline to week 4; ΔWeek 8: changes in values from baseline to week 8; ΔWeek 12: changes in values from baseline to week 12; SBP: systolic blood pressure; DBP: diastolic blood pressure; bpm: beats per minute; BW: body weight; BFR: body fat rate; BMI: body mass index; WBC: white blood cell; RBC: red blood cell; Hb: hemoglobin; Ht: hematocrit; Plt: platelet; AST: aspartate aminotransferase; ALT: alanine aminotransferase; γ-GTP: gamma-glutamyl transpeptidase; ALP: alkaline phosphatase; LDH: lactate dehydrogenase; BUN: blood urea nitrogen; CRE: creatinine; UA: uric acid; FPG; fasting plasma glucose; HbA1c: hemoglobin A1c; HOMA-IR: homeostasis model assessment of insulin resistance.
